# Supplementary material for: Natural history of multiple myeloma with de novo del(17p)
Source: PubMed Central journal article supplement (PMC6405846; doi:10.1038/s41408-019-0191-y), 2019-03-07
Supplement: 41408_2019_191_MOESM1_ESM.pdf [file 41408_2019_191_MOESM1_ESM.pdf]

**SUPPLEMENTARY MATERIAL**

**for**

**Natural History of Multiple Myeloma with de novo del(17p)**

| <b>Supplementary Table 1 - Induction regimens used in the study patients</b> |                  |                          |               |
|------------------------------------------------------------------------------|------------------|--------------------------|---------------|
|                                                                              | De novo del(17p) | High-risk translocations | Standard-risk |
| PI-based                                                                     | 219 (71.1)       | 58 (73.4)                | 280 (51.8)    |
| • PI+IMiD                                                                    | 119 (38.6)       | 19 (24.0)                | 103 (19.0)    |
| • PI                                                                         | 100 (32.5)       | 39 (49.4)                | 177 (32.8)    |
| IMiD-based                                                                   | 79 (25.6)        | 20 (25.3)                | 248 (45.8)    |
| Others                                                                       | 10 (3.2)         | 1 (1.3)                  | 13 (2.4)      |

P<0.001 for Fisher's exact test; IMiD indicates immunomodulatory drug; and PI, proteasome inhibitor.

| <b>Supplementary Table 2 - Best response to induction therapy (n=902)</b> |                             |                                       |                          |           |
|---------------------------------------------------------------------------|-----------------------------|---------------------------------------|--------------------------|-----------|
| <i>Best response to therapy</i>                                           | De novo del(17p)<br>(n=289) | High-risk<br>translocations<br>(n=79) | Standard-risk<br>(n=534) | <i>p*</i> |
| CR+VGPR                                                                   | 118 (40.8)                  | 46 (58.2)                             | 218 (40.8)               | 0.012     |
| CR+VGPR+PR (ORR)                                                          | 221 (76.5)                  | 69 (87.3)                             | 453 (84.8)               | 0.006     |
| CR+VGPR+PR+MR (CBR)                                                       | 247 (85.5)                  | 76 (96.2)                             | 495 (92.7)               | <0.001    |
| sCR                                                                       | 14 (4.8)                    | 9 (11.4)                              | 29 (5.4)                 |           |
| CR                                                                        | 9 (3.1)                     | 5 (6.3)                               | 28 (5.2)                 |           |
| VGPR                                                                      | 95 (32.9)                   | 32 (40.5)                             | 162 (30.3)               |           |
| PR                                                                        | 103 (35.6)                  | 23 (29.1)                             | 234 (43.8)               |           |
| MR                                                                        | 26 (9.0)                    | 7 (8.9)                               | 42 (7.9)                 |           |
| SD                                                                        | 35 (12.1)                   | 3 (3.8)                               | 34 (6.4)                 |           |
| PD                                                                        | 7 (2.4)                     | 0 (0)                                 | 5 (1.0)                  |           |

CBR indicates clinical benefit rate; CR, complete response; MR, minimal response; ORR, overall response rate; PD, progressive disease; PR, partial response; sCR, stringent CR; SD, stable disease; and VGPR, very good partial response. \*P for Fisher's exact test.

**Supplementary figure 1- Survival outcomes in patients with del(17p13.1) and monosomy 17.** Kaplan Meier curves showing comparison of (a) Progression-free survival (PFS) and (b) overall survival (OS) between patients with del(17p13.1) (n=246) and monosomy 17 (n=41). Two patients with concurrent del(17p13.1) and monosomy 17 were excluded. For PFS, P= 0.486 for del(17p13.1) vs. monosomy 17; for OS, P=0.832 for del(17p13.1) vs. monosomy 17.

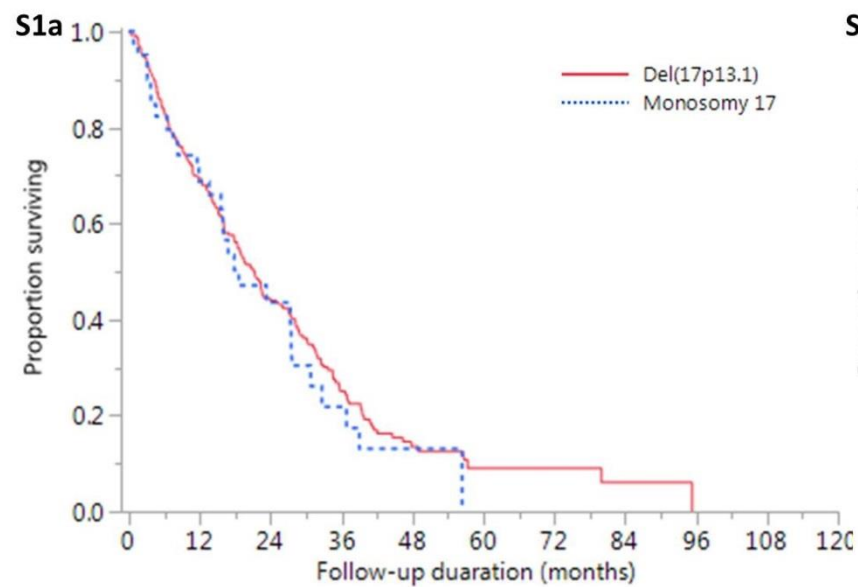

|             |     |     |    |    |    |   |   |   |   |   |   |
|-------------|-----|-----|----|----|----|---|---|---|---|---|---|
| Del(17p)    | 246 | 147 | 85 | 40 | 14 | 5 | 4 | 2 | 0 | 0 | 0 |
| Monosomy 17 | 41  | 25  | 10 | 5  | 1  | 0 | 0 | 0 | 0 | 0 | 0 |

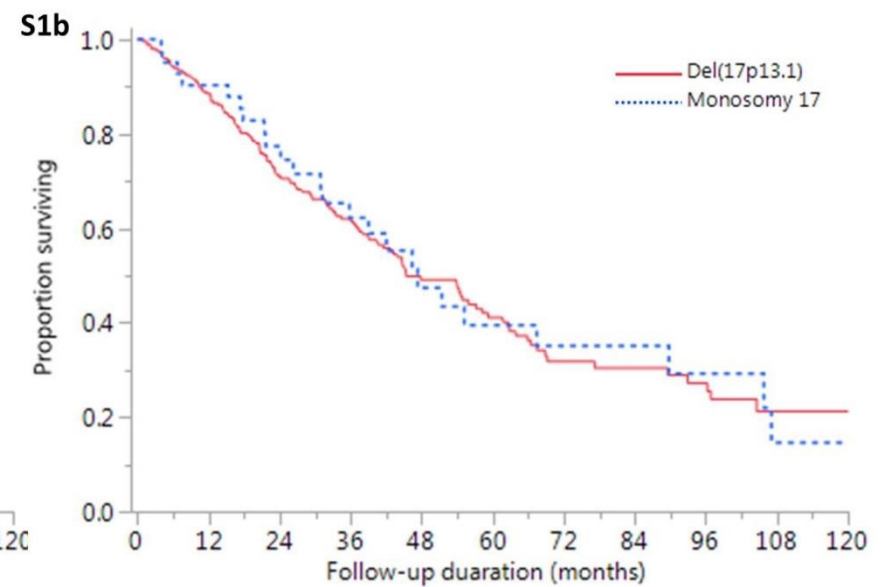

|     |     |     |     |    |    |    |    |    |   |   |
|-----|-----|-----|-----|----|----|----|----|----|---|---|
| 246 | 213 | 156 | 114 | 68 | 44 | 26 | 22 | 16 | 5 | 1 |
| 41  | 37  | 27  | 20  | 12 | 9  | 7  | 6  | 5  | 2 | 1 |

**Supplementary figure 2- Survival outcomes in patients with del(17p13.1) and/or monosomy 17 [del(17p)] and relative loss of 17p.**

Kaplan Meier curves showing comparison of (a) Progression-free survival (PFS) and (b) overall survival (OS) between patients with del(17p) (n=289) and relative loss of 17p (n=21). For PFS, P= 0.485 for del(17p) vs. relative loss of 17p; for OS, P=0.603 for del(17p) vs. relative loss of 17p.

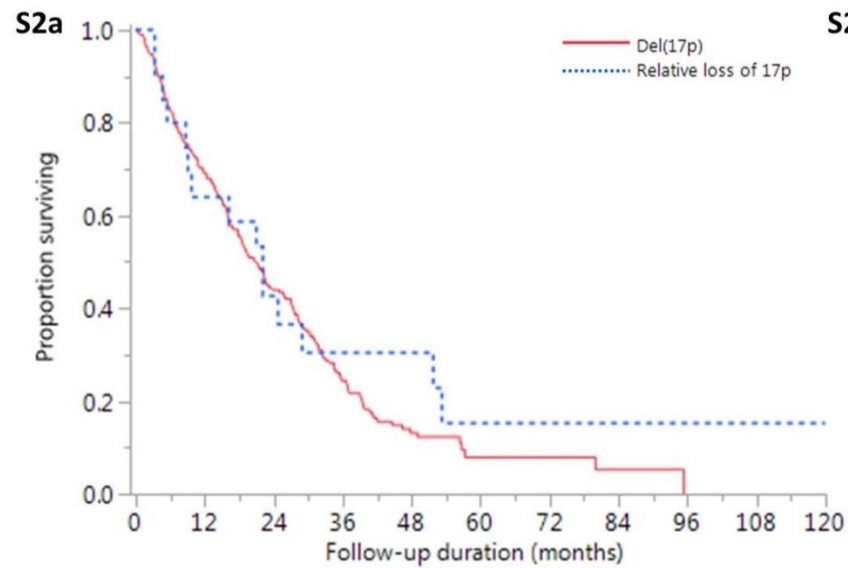

|                      |     |     |    |    |    |   |   |   |   |   |   |
|----------------------|-----|-----|----|----|----|---|---|---|---|---|---|
| Del(17p)             | 289 | 173 | 96 | 45 | 15 | 5 | 4 | 2 | 0 | 0 | 0 |
| Relative loss of 17p | 21  | 12  | 7  | 4  | 4  | 1 | 1 | 1 | 1 | 1 | 1 |

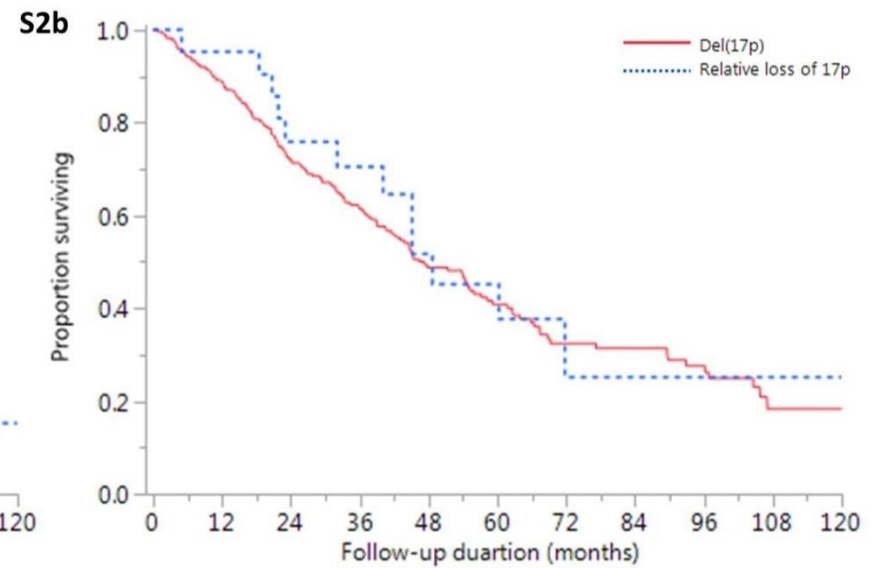

|                      |     |     |     |     |    |    |    |    |    |   |   |
|----------------------|-----|-----|-----|-----|----|----|----|----|----|---|---|
| Del(17p)             | 289 | 252 | 185 | 135 | 80 | 53 | 33 | 28 | 21 | 7 | 2 |
| Relative loss of 17p | 21  | 20  | 15  | 12  | 8  | 6  | 2  | 2  | 2  | 1 | 1 |

**Supplementary figure 3- Survival outcomes in patients with del(17p) and high-risk translocation.** Kaplan Meier curves showing comparison of (a) Progression-free survival (PFS) and (b) overall survival (OS) between patients with del(17p) and no high-risk chromosomal translocation (n=235), high-risk translocation (HRT) (n=79) and del(17p) with high-risk translocations (n=75). The median PFS in the three groups were 22.9 months (95% CI, 20.6-27.5), 22.0 months (95% CI, 16.7-26.8) and 14.7 months (95% CI, 9.8-17.9) respectively (P= 0.951 for del(17p) with no high-risk translocation vs. HRT; P<0.001 for del(17p) with no high-risk translocation vs. del(17p) with high-risk translocation). The median OS in the three groups were 54.9 months (95% CI, 45.4-64.0), 79.1 months (95% CI, 53.9-NR) and 29.5 months (95% CI, 20.0-38.1) respectively (P=0.052 for del(17p) with no high-risk translocation vs. HRT; P<0.001 for del(17p) with no high-risk translocation vs. del(17p) with high-risk translocation)

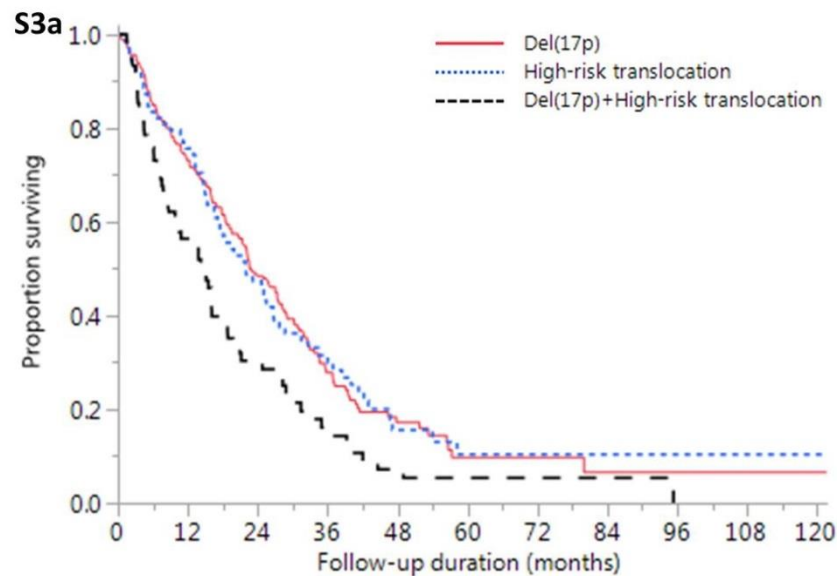

|              |     |     |    |    |    |   |   |   |   |   |   |
|--------------|-----|-----|----|----|----|---|---|---|---|---|---|
| Del(17p)     | 235 | 147 | 85 | 40 | 15 | 5 | 4 | 2 | 1 | 1 | 1 |
| HRT          | 79  | 58  | 34 | 19 | 6  | 4 | 4 | 2 | 1 | 1 | 1 |
| Del(17p)+HRT | 75  | 38  | 18 | 9  | 4  | 1 | 1 | 1 | 0 | 0 | 0 |

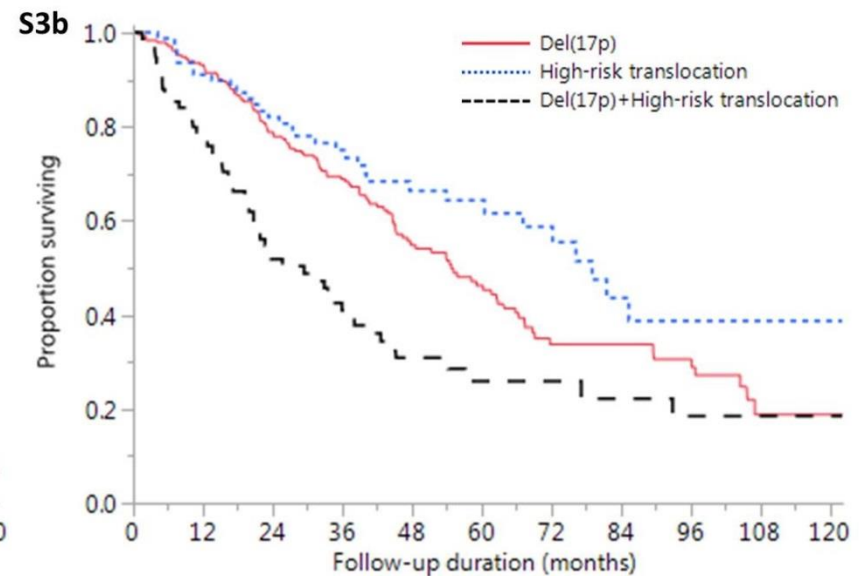

|     |     |     |     |    |    |    |    |    |   |   |
|-----|-----|-----|-----|----|----|----|----|----|---|---|
| 235 | 215 | 164 | 121 | 70 | 49 | 27 | 24 | 18 | 6 | 2 |
| 79  | 71  | 62  | 48  | 33 | 24 | 18 | 9  | 6  | 5 | 4 |
| 75  | 57  | 36  | 26  | 18 | 10 | 8  | 6  | 5  | 2 | 1 |

**Supplementary figure 4- Survival outcomes in patients with del(17p) based on year of diagnosis.** Kaplan Meier curves showing comparison of overall survival (OS) between patients categorized according to the year of diagnosis of multiple myeloma.

(a) Comparison of patients diagnosed during 2004-2007, 2008-2012 and 2013-2016. \*P-value for log rank test across the three groups and \*\*P-value for log rank test between 2004-2007 and 2008-2012. The difference in OS across groups is driven by the improved survival in the 2013-2016 group. (b) Comparison of patients diagnosed between 2013-2016 and 2004-2012 showing significant difference in OS.

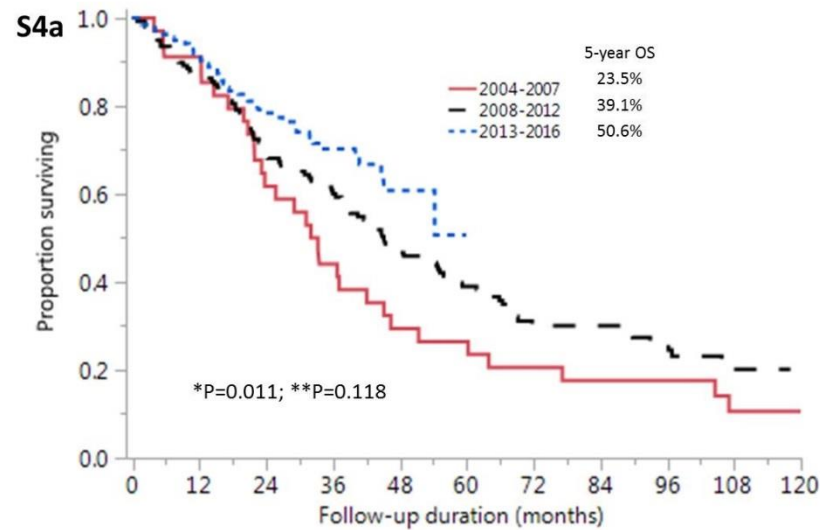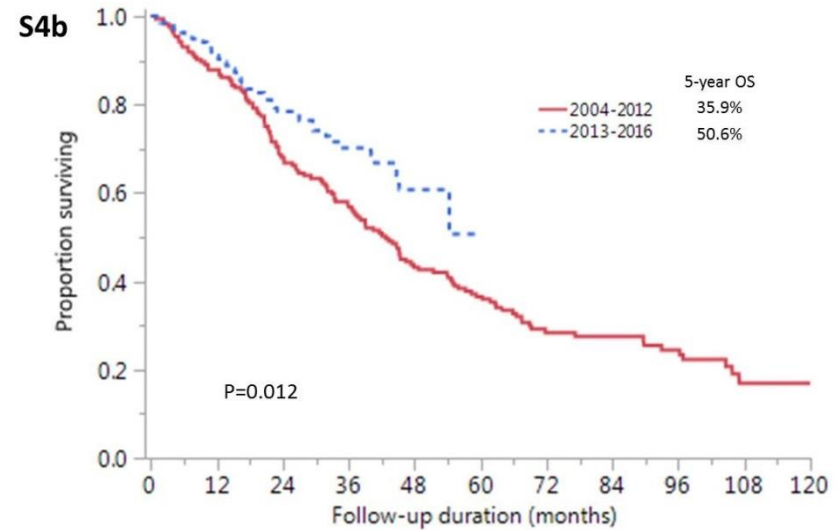

|           |     |     |    |    |    |    |    |    |    |   |   |
|-----------|-----|-----|----|----|----|----|----|----|----|---|---|
| 2004-2007 | 34  | 31  | 21 | 15 | 10 | 8  | 7  | 5  | 5  | 3 | 3 |
| 2008-2012 | 139 | 120 | 95 | 81 | 63 | 50 | 28 | 25 | 17 | 5 | 1 |
| 2013-2016 | 137 | 121 | 84 | 51 | 15 | 1  | -  | -  | -  | - | - |

|           |     |     |     |    |    |    |    |    |    |   |   |
|-----------|-----|-----|-----|----|----|----|----|----|----|---|---|
| 2004-2012 | 173 | 151 | 116 | 96 | 73 | 59 | 35 | 30 | 23 | 8 | 3 |
| 2013-2016 | 137 | 121 | 84  | 51 | 15 | 1  | -  | -  | -  | - | - |

**Supplementary figure 5- Survival outcomes in patients with del(17p) based on ISS, LDH and concurrent high-risk translocation.**

Kaplan Meier curves showing comparison of (a) Progression-free survival (PFS) and (b) overall survival (OS) between patients categorized into low-risk (ISS I stage, normal LDH and no high-risk translocation; n=34); intermediate-risk (neither low nor high-risk; n=140); and high-risk (ISS III stage and either elevated LDH or coexistent high-risk translocation; n=47).

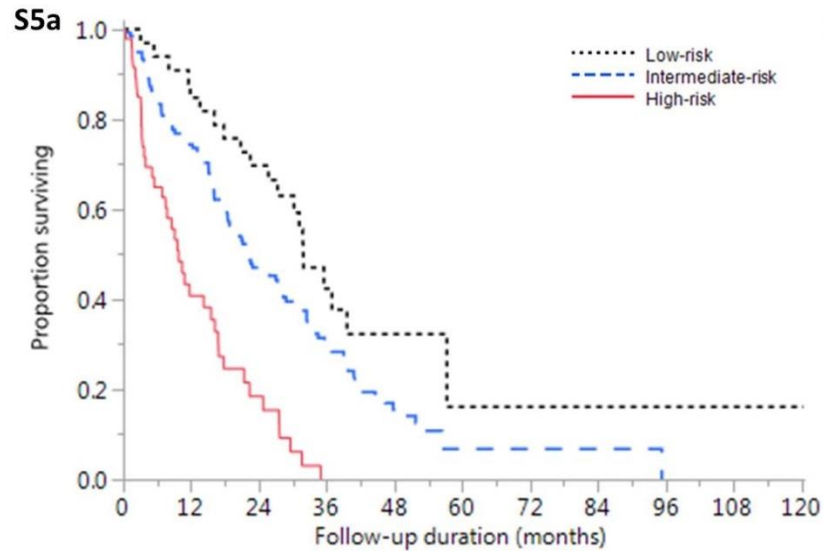

|                   |     |    |    |    |    |   |   |   |   |   |
|-------------------|-----|----|----|----|----|---|---|---|---|---|
| Low-risk          | 34  | 28 | 22 | 9  | 4  | 2 | 1 | 1 | 1 | 1 |
| Intermediate-risk | 140 | 91 | 51 | 30 | 11 | 2 | 2 | 2 | 0 | 0 |
| High-risk         | 47  | 16 | 6  | 0  | 0  | 0 | 0 | 0 | 0 | 0 |

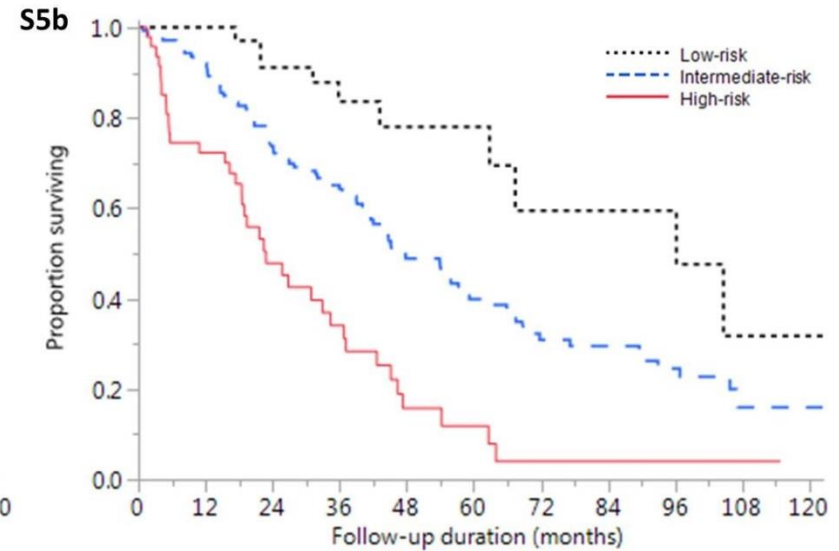

|                   |     |     |    |    |    |    |    |    |    |   |   |
|-------------------|-----|-----|----|----|----|----|----|----|----|---|---|
| Low-risk          | 34  | 34  | 31 | 20 | 11 | 9  | 6  | 6  | 5  | 1 | 1 |
| Intermediate-risk | 140 | 127 | 98 | 79 | 50 | 33 | 23 | 19 | 14 | 4 | 2 |
| High-risk         | 47  | 33  | 18 | 12 | 5  | 3  | 1  | 1  | 1  | 1 | 0 |

| <b>Supplementary Table 3- Progression free survival and overall survival for patients stratified by cut-point for del (17p) (n=260)</b> |                                       |              |                                       |                  |
|-----------------------------------------------------------------------------------------------------------------------------------------|---------------------------------------|--------------|---------------------------------------|------------------|
|                                                                                                                                         | <i>PFS</i>                            | <i>p*</i>    | <i>OS</i>                             | <i>p*</i>        |
| • ≥20% vs. <20% (224 vs. 36)                                                                                                            | 19.2 (16.1-22.9) vs. 32.5 (21.1-36.6) | 0.087        | 45.3 (40.5-55.2) vs. NR (43.9-NR)     | <b>0.002</b>     |
| • ≥30% vs. <30% (207 vs. 53)                                                                                                            | 18.8 (16.1-22.6) vs. 30.8 (21.6-36.6) | 0.065        | 45.2 (38.1-54.6) vs. 89.6 (53.9-NR)   | <b>0.001</b>     |
| • ≥40% vs. <40% (193 vs. 67)                                                                                                            | 18.3 (15.9-22.1) vs. 30.8 (22.3-33.7) | <b>0.014</b> | 45.2 (37.1-54.6) vs. 89.6 (43.9-NR)   | <b>0.002</b>     |
| • ≥50% vs. <50% (170 vs. 90)                                                                                                            | 17.8 (15.1-21.0) vs. 30.3 (22.3-32.5) | <b>0.027</b> | 44.8 (35.8-55.2) vs. 58.3 (45.2-96.2) | <b>0.013</b>     |
| • ≥60% vs. <60% (153 vs. 107)                                                                                                           | 16.8 (14.5-19.2) vs. 28.3 (22.5-31.8) | 0.051        | 38.1 (31.9-54.3) vs. 58.3 (47.3-96.2) | <b>&lt;0.001</b> |
| *P for log rank test; NR, not reached.                                                                                                  |                                       |              |                                       |                  |
